# Supplementary material for: Targeting specificity of APOBEC-based cytosine base editor in human iPSCs determined by whole genome sequencing
Source: PubMed Central journal article supplement (PMC6877639; doi:10.1038/s41467-019-13342-8), 2019-11-25
Supplement: 41467_2019_13342_MOESM1_ESM.pdf [file 41467_2019_13342_MOESM1_ESM.pdf]

## **Supplementary Information**

### **Targeting Specificity of APOBEC-based Cytosine Base Editor in Human iPSCs Determined by Whole Genome Sequencing**

McGrath, Shin et al.

**Supplementary Table 1: Whole genome sequencing statistics**

| <b>Sample ID</b> | <b>Picard depth</b> | <b>Samtools depth</b> | <b># Reads</b> | <b>Yield (Mbases)</b> | <b>% Bases &gt;= 30</b> |
|------------------|---------------------|-----------------------|----------------|-----------------------|-------------------------|
| CL1 Parental     | 23.4                | 25.3                  | 323,254,930    | 96,976                | 89.95                   |
| CL1 Parental     | 29                  | 30.8                  | 391,963,416    | 117,589               | 92.18                   |
| CL1-N1           | 30                  | 30.1                  | 374,477,025    | 112,343               | 89.41                   |
| CL1-N2           | 32.7                | 33.8                  | 435,179,454    | 130,554               | 92.47                   |
| CL1-N3           | 29.5                | 30.2                  | 380,223,124    | 114,067               | 92.48                   |
| HK31             | 33.4                | 34.7                  | 428,082,017    | 128,425               | 89.63                   |
| HK32M            | 29.1                | 29.9                  | 377,001,520    | 113,100               | 91.49                   |
| HK33M            | 30.2                | 32.3                  | 428,018,362    | 128,406               | 92.45                   |
| HK34             | 32.4                | 33.2                  | 412,328,064    | 123,698               | 89.59                   |
| HK34M            | 26.2                | 27.6                  | 348,482,480    | 104,545               | 92.52                   |
| HK36             | 30.1                | 31.8                  | 403,464,291    | 121,039               | 91.93                   |
| EX1M             | 30.2                | 30.2                  | 389,862,750    | 116,959               | 91.29                   |
| RF23M            | 29.3                | 31.7                  | 401,399,024    | 120,420               | 92.19                   |
| RF24M            | 23.4                | 25.5                  | 339,541,224    | 101,862               | 92.15                   |
| AN21-1           | 24.8                | 27.8                  | 429,234,343    | 128,770               | 92.44                   |
| AN21-2           | 29.3                | 29.9                  | 369,661,266    | 110,898               | 92.43                   |
| ANC-1            | 28.5                | 29.2                  | 379,056,876    | 113,717               | 92.42                   |
| ANC-2            | 29.5                | 30.1                  | 391,410,192    | 117,423               | 92.76                   |

**Supplementary Table 2: Overlap of sequence variants (including on-target editing) identified in each iPSC clone.**

|            | N1  | N2  | N3  | HK31 | HK32<br>M | HK33<br>M | HK34<br>M | HK34 | HK36 | EX1M | RF23<br>M | RF24<br>M | AN21<br>-1 | AN21<br>-2 | ANC-<br>1 | ANC-<br>2 |
|------------|-----|-----|-----|------|-----------|-----------|-----------|------|------|------|-----------|-----------|------------|------------|-----------|-----------|
| N1         | 186 | 4   | 4   | 5    | 3         | 2         | 6         | 2    | 3    | 4    | 1         | 1         | 3          | 2          | 1         | 3         |
| N2         | 4   | 171 | 5   | 7    | 2         | 3         | 3         | 5    | 4    | 1    | 1         | 1         | 4          | 0          | 4         | 6         |
| N3         | 4   | 5   | 145 | 4    | 2         | 1         | 4         | 7    | 2    | 4    | 1         | 2         | 5          | 4          | 3         | 4         |
| HK31       | 5   | 7   | 4   | 164  | 7         | 4         | 7         | 8    | 3    | 4    | 4         | 2         | 5          | 2          | 2         | 7         |
| HK32<br>M  | 3   | 2   | 2   | 7    | 242       | 4         | 5         | 5    | 4    | 3    | 1         | 3         | 1          | 2          | 0         | 1         |
| HK33<br>M  | 2   | 3   | 1   | 4    | 4         | 836       | 4         | 4    | 2    | 1    | 0         | 0         | 2          | 2          | 0         | 3         |
| HK34<br>M  | 6   | 3   | 4   | 7    | 5         | 4         | 113       | 4    | 5    | 4    | 3         | 3         | 4          | 3          | 1         | 5         |
| HK34       | 2   | 5   | 7   | 8    | 5         | 4         | 4         | 2300 | 5    | 4    | 2         | 2         | 2          | 3          | 5         | 4         |
| HK36       | 3   | 4   | 2   | 3    | 4         | 2         | 5         | 5    | 235  | 3    | 0         | 2         | 16         | 18         | 19        | 20        |
| EX1M       | 4   | 1   | 4   | 4    | 3         | 1         | 4         | 4    | 3    | 272  | 3         | 3         | 3          | 5          | 3         | 4         |
| RF23<br>M  | 1   | 1   | 1   | 4    | 1         | 0         | 3         | 2    | 0    | 3    | 599       | 1         | 1          | 3          | 2         | 1         |
| RF24<br>M  | 1   | 1   | 2   | 2    | 3         | 0         | 3         | 2    | 2    | 3    | 1         | 1813      | 3          | 2          | 1         | 1         |
| AN21-<br>1 | 3   | 4   | 5   | 5    | 1         | 2         | 4         | 2    | 16   | 3    | 1         | 3         | 7896       | 494        | 540       | 577       |
| AN21-<br>2 | 2   | 0   | 4   | 2    | 2         | 2         | 3         | 3    | 18   | 5    | 3         | 2         | 494        | 4605       | 423       | 422       |
| ANC-1      | 1   | 4   | 3   | 2    | 0         | 0         | 1         | 5    | 19   | 3    | 2         | 1         | 540        | 423        | 869       | 495       |
| ANC-2      | 3   | 6   | 4   | 7    | 1         | 3         | 5         | 4    | 20   | 4    | 1         | 1         | 577        | 422        | 495       | 847       |

**Supplementary Table 3: PCR primers used in this study.**

| Name        | Sequence (5' – 3')                                  | Purpose                                                                                                              |
|-------------|-----------------------------------------------------|----------------------------------------------------------------------------------------------------------------------|
| AncBE4max-F | CTTCCTACCCTCGTAAAGGTACCGCCAC<br>CATGAAACGGACAGCCGAC | Forward primer to amplify the AncBE4max-GFP transgene for construction of the inducible piggyBAC vector XL-AncBE4max |
| AncBE4max-R | CGCAGGGGAGGTGGTCTACTAGTCAAT<br>GGTGATGGTGATGATG     | Reverse primer to amplify the AncBE4max-GFP transgene for construction of the inducible piggyBAC vector XL-AncBE4max |
| HEK3-F      | CTTGCCATGAGAAACCTTGG                                | Forward primer to amplify the genomic region edited by base editor and HEK3 gRNA                                     |
| HEK3-R      | AGCCCCTGTCTAGGAAAAGC                                | Reverse primer to amplify the genomic region edited by base editor and HEK3 gRNA                                     |
| EMX1-F      | GCCCCTAACCCCTATGTAGCC                               | Forward primer to amplify the genomic region edited by base editor and EMX1 gRNA                                     |
| EMX1-R      | CACCCTAGTCATTGGAGGTGA                               | Reverse primer to amplify the genomic region edited by base editor and EMX1 gRNA                                     |
| RNF2-F      | ACGTCTCATATGCCCTTGG                                 | Forward primer to amplify the genomic region edited by base editor and RNF2 gRNA                                     |
| RNF2-R      | ACGTAGGAATTTGGTGGGACA                               | Reverse primer to amplify the genomic region edited by base editor and RNF2 gRNA                                     |

Note: PCR primers used in off-target validations are listed in Supplementary Data 3.

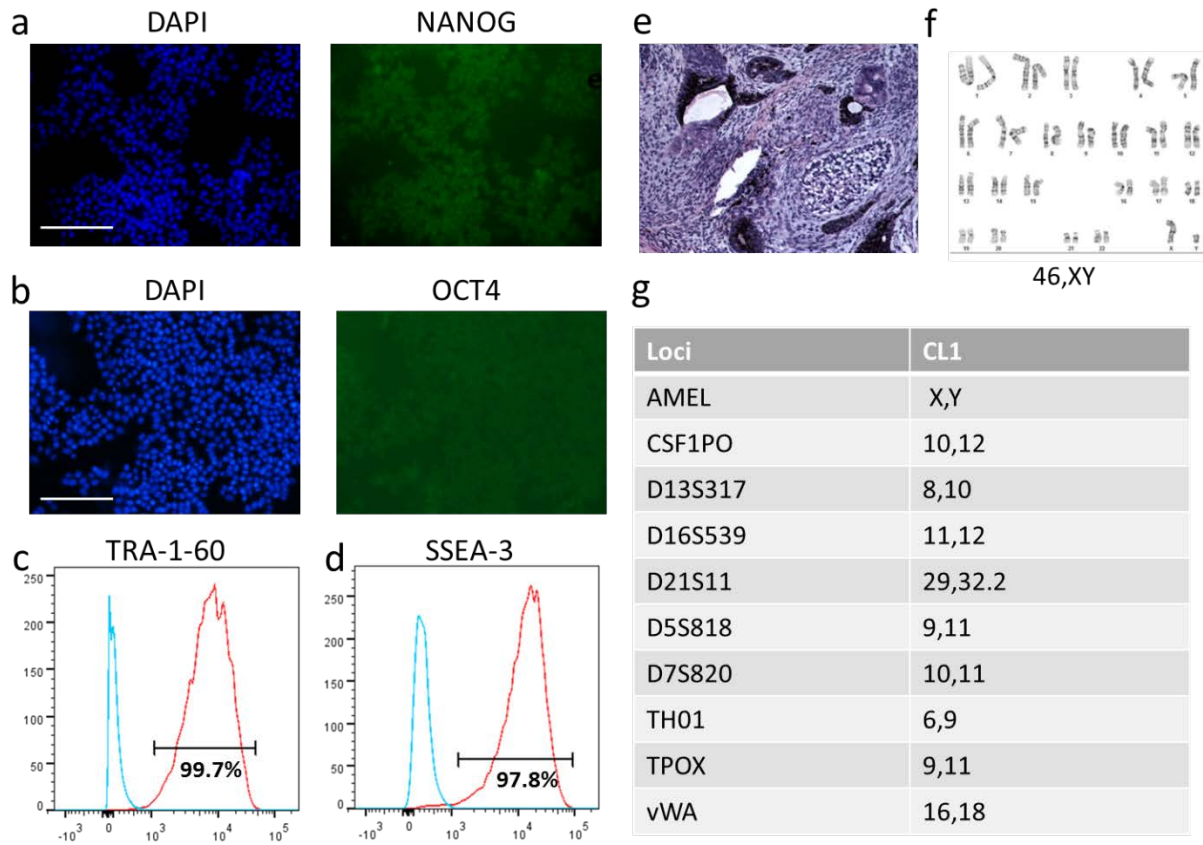

**Supplementary Figure 1. Characterization of CL1 iPSC line.** **a.** Representative images of immunohistochemistry staining of CL1 cells with DAPI (blue) and anti-NANOG antibody (green). Scale bars represent 100 $\mu$ m. **b.** Representative images of immunohistochemistry staining of CL1 cells with DAPI (blue) and anti-OCT4 antibody (green). Scale bars represent 100 $\mu$ m. **c.** Flow cytometry analysis of CL1 cells stained with TRA-1-60 (red) compared to unstained CL1 cells (blue). **d.** Flow cytometry analysis of CL1 cells stained with SSEA-3 (red) compared to unstained CL1 cells (blue). **e.** Representative hematoxylin and eosin staining of teratoma generated from CL1 line. **f.** Karyotype of CL1 line. **g.** Short tandem repeat (STR) profiling of CL1.

## BE4

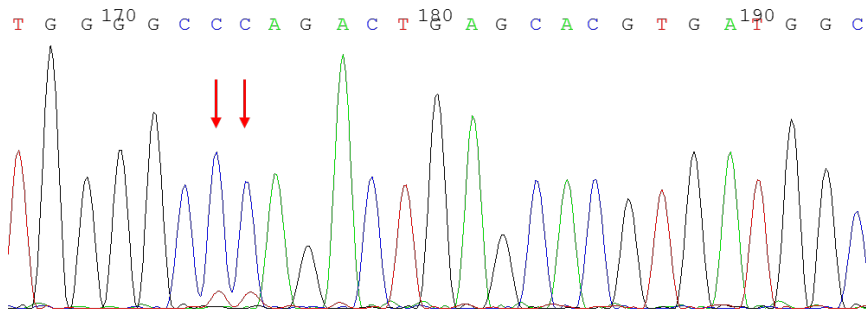

## AncBE4max

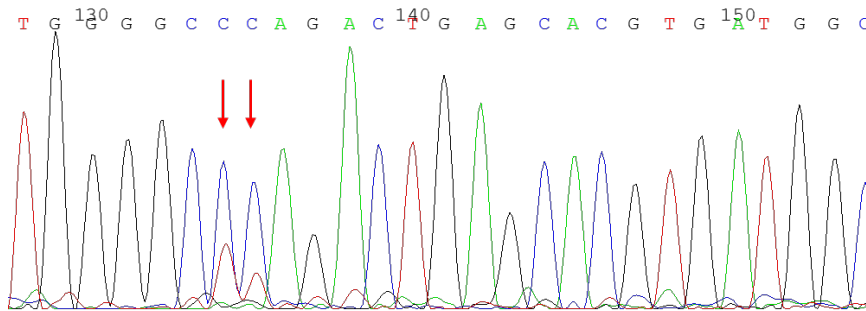

**Supplementary Figure 2. Sanger sequencing comparison of iPSCs edited by BE4 or AncBE4max.** iPSCs ( $1 \times 10^6$ ) were co-transfected with 3 ug of sgRNA-HEK3-expressing plasmid and 9 ug of either pCMV-BE4 or pCMV-AncBE4max-GFP plasmid. Three days after the transfection, the bulk cell populations were harvested for genomic DNA isolation, followed by PCR amplification as described in Methods. Sanger sequencing results of the PCR products are shown. The red arrows indicate where potential C->T mutations occur.

Sites of C -> T mutations:

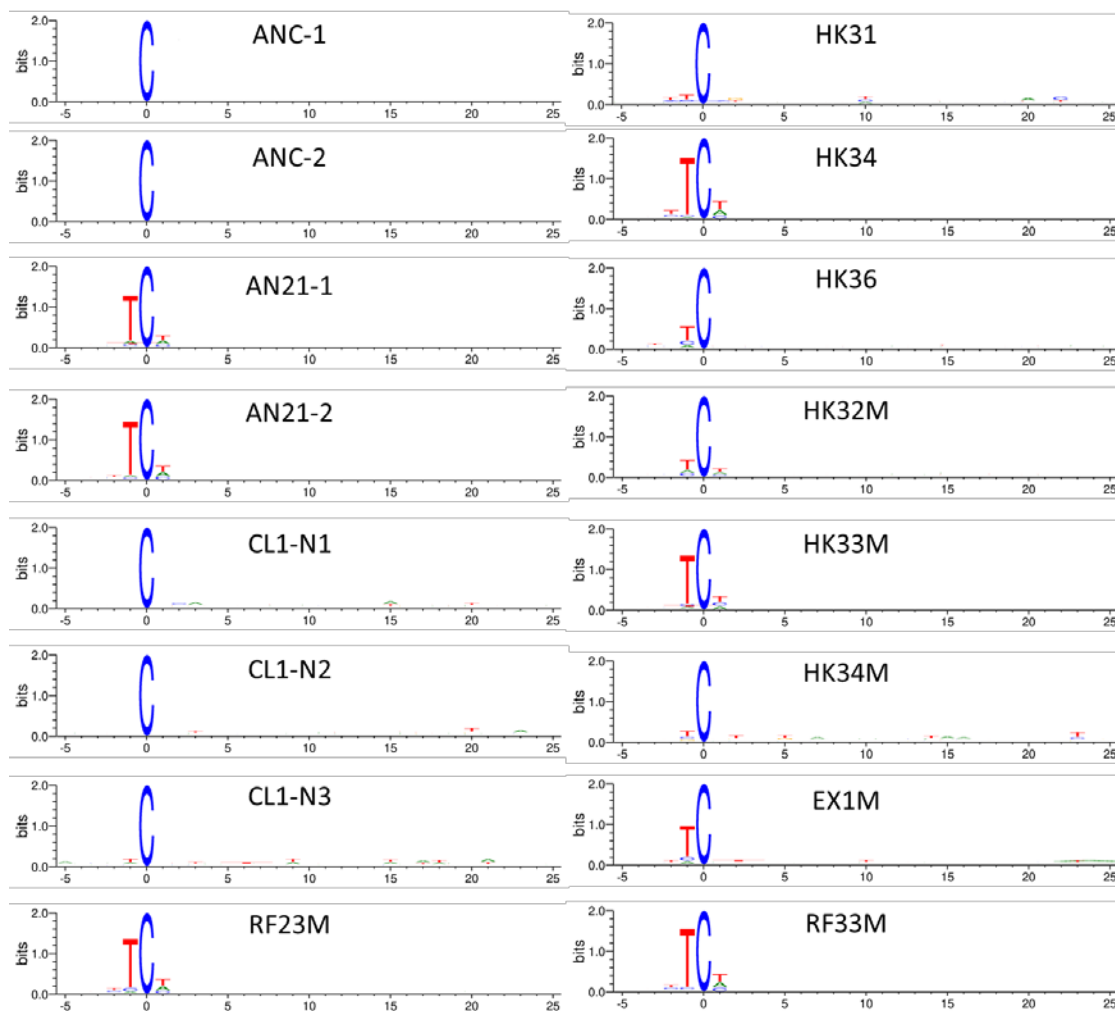

Sites of C -> G mutations:

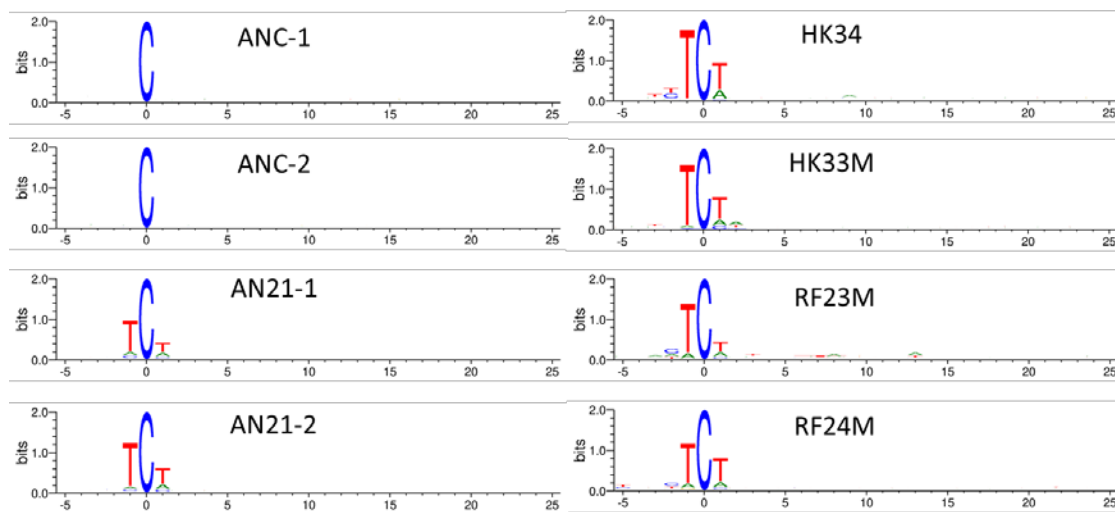

**Supplementary Figure 3. Sequence logos of the conserved bases around the C->T and C->G mutations in each iPSC clone.** Sequence conservation at positions from -5 to +25 is shown, with the mutated C at position 0.



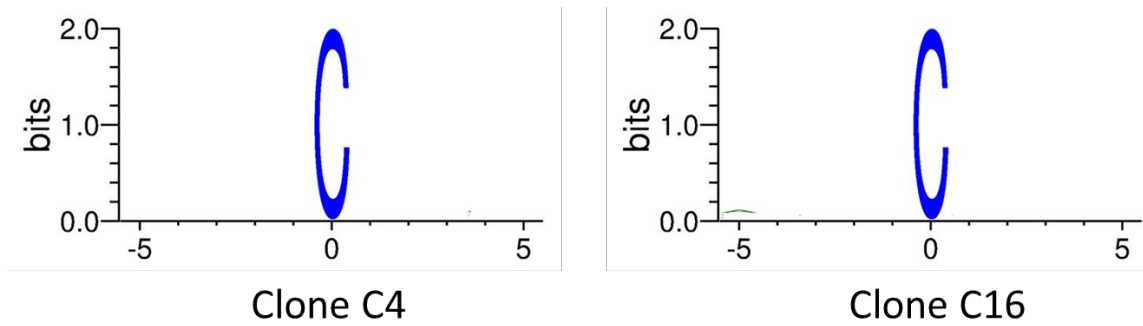

**Supplementary Figure 4. Sequence logos of the conserved bases around the C->T mutations in CRISPR/Cas9 edited iPSC clones.** Sequence conservation around the mutated C in iPSC Clone C4 and Clone C16, which have been edited by CRISPR/Cas9 at the AAVS1 site (Reference 32). The sequence logos were generated by re-analyzing the WGS data from SRP042612 in NCBI SRA database.

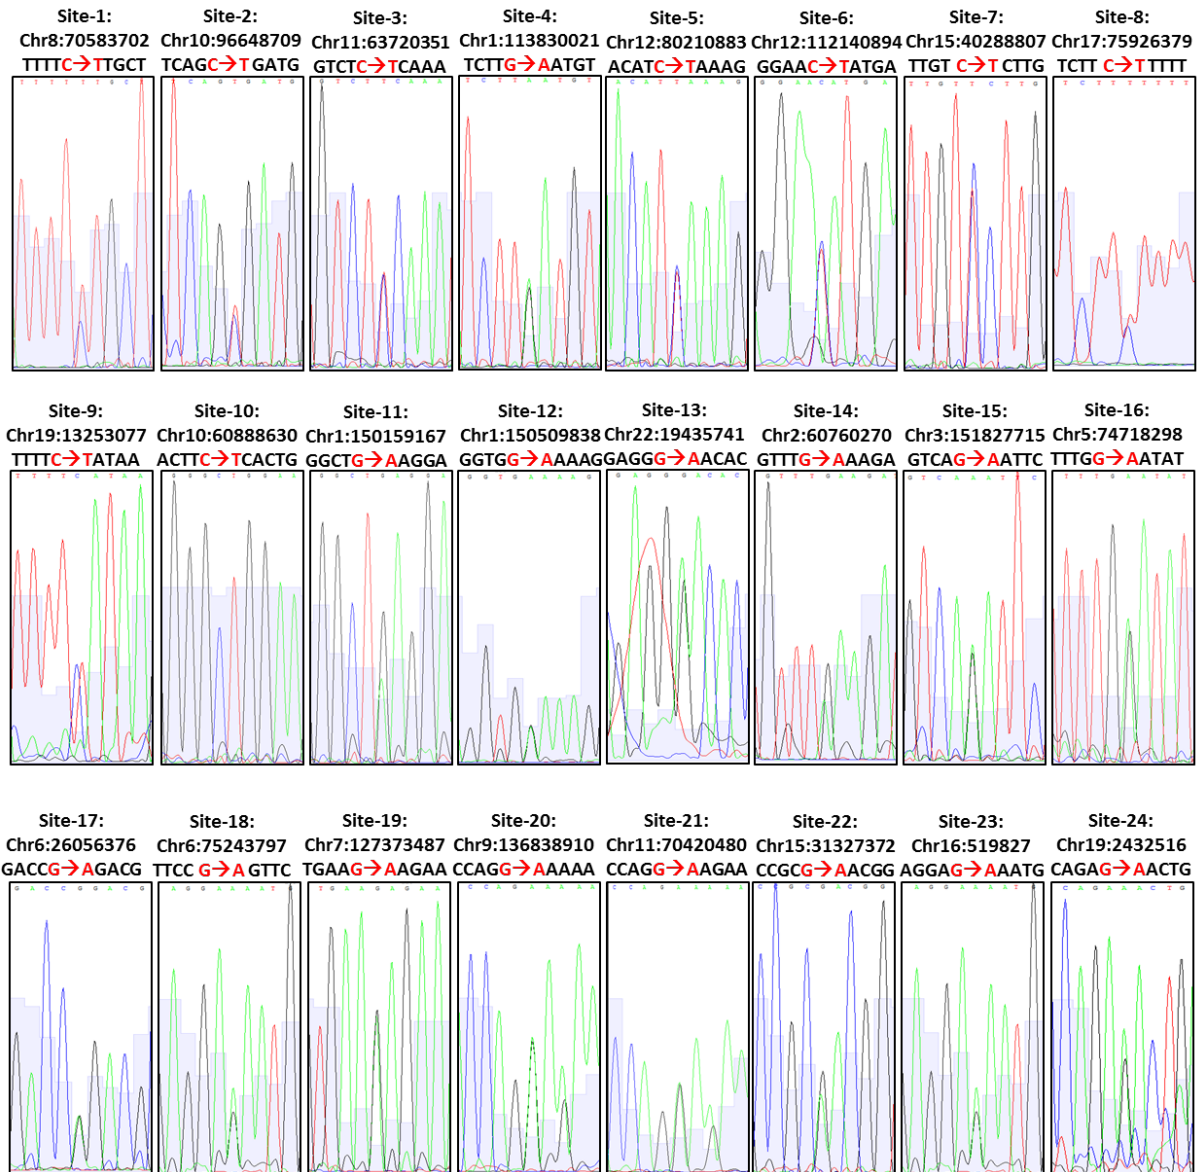

**Supplementary Figure 5. Sanger sequencing validation of nonsynonymous exonic SNVs in clone AN21-2.** PCR products of the genomic regions containing the WGS-identified mutation sites were sequenced. Electropherogram of each sequencing around the putative mutation site, along with the chromosomal location (based on hg38) are shown. Nucleotide changes are shown in red. Detailed information on the mutation sites and PCR primers can be found in Supplementary Data 3.
